# Supplementary material for: Septoria Leaf Blotch and Reduced Nitrogen Availability Alter WRKY Transcription Factor Expression in a Codependent Manner
Source: Int J Mol Sci. 2020 Jun 11;21(11):4165. doi: 10.3390/ijms21114165 (PMC7312603; doi:10.3390/ijms21114165)
Supplement: Supplementary file 1 [file ijms-21-04165-s001.pdf]

## Supplementary Tables

**Supplementary Table 1** Primers sequences to amplify sections of transcripts in wheat or regions in *Zymoseptoria tritici*. Non-standard base codes are R = A or G, Y = C or T, M = A or C.

| Target<br>Gene                          | Forward Primers Sequence  | Reverse Primer Sequence |
|-----------------------------------------|---------------------------|-------------------------|
| Internal<br>Transcribed<br>Spacer (ITS) | GGAAGTAAAAGTCGTAACAAGG    | TCCTCCGCTTATTGATATGC    |
| Ubiquitin                               | ACCATTGACAACGTGAAGGC      | TGGATGTTGTAGTCCGCCAAG   |
| WRKY2                                   | CTCTTTGGCTTCTCCTTTCACG    | TGTTGTTGTTGCTGCTGCTG    |
| WRKY10                                  | AATTTCTGAAGCCGGTGATCC     | CCGTACATGTTTCATCGTCTCG  |
| WRKY19                                  | TTGGCAACTTCAGTGCTGAC      | ACCAGTGTGTGATGGCAAAG    |
| WRKY53b                                 | GCCATGTCCTCCTCCACG        | ACAGAAGCTCGGTGAAGGAC    |
| WRKY68a                                 | GACCATGGCCGTGGACCC        | CGGAGAGGGAGGAGACGAG     |
| WRKY39                                  | AATTTAAGAAAGACATGGACGAGCA | CACGAGGATCTTGGTCACCG    |

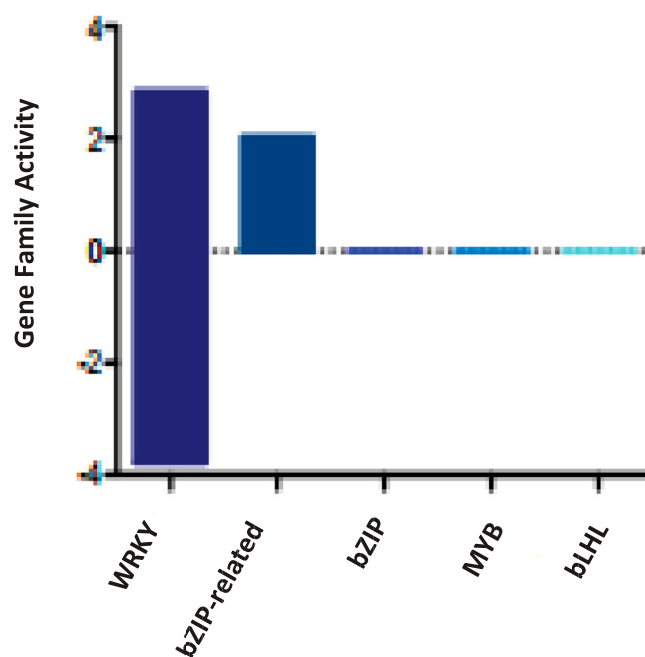

**Supplementary Figure 1.** Variation in expression of transcription factor superfamily genes in wheat under reduced nitrogen conditions in the field analysed by microarray. WRKYs show clear up- and down- regulation in response to nitrogen stress, whilst bZIP-related genes are upregulated. Differential expression of bZIP, MYB and bHLH transcription factor families is not seen in response to low nitrogen.

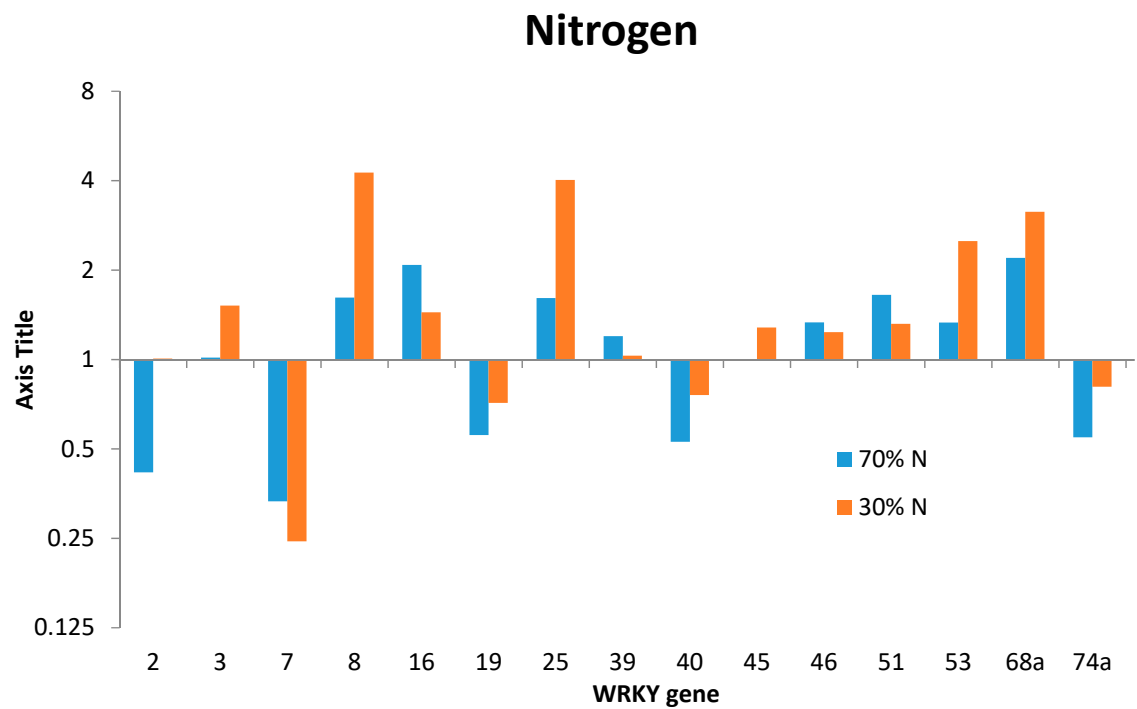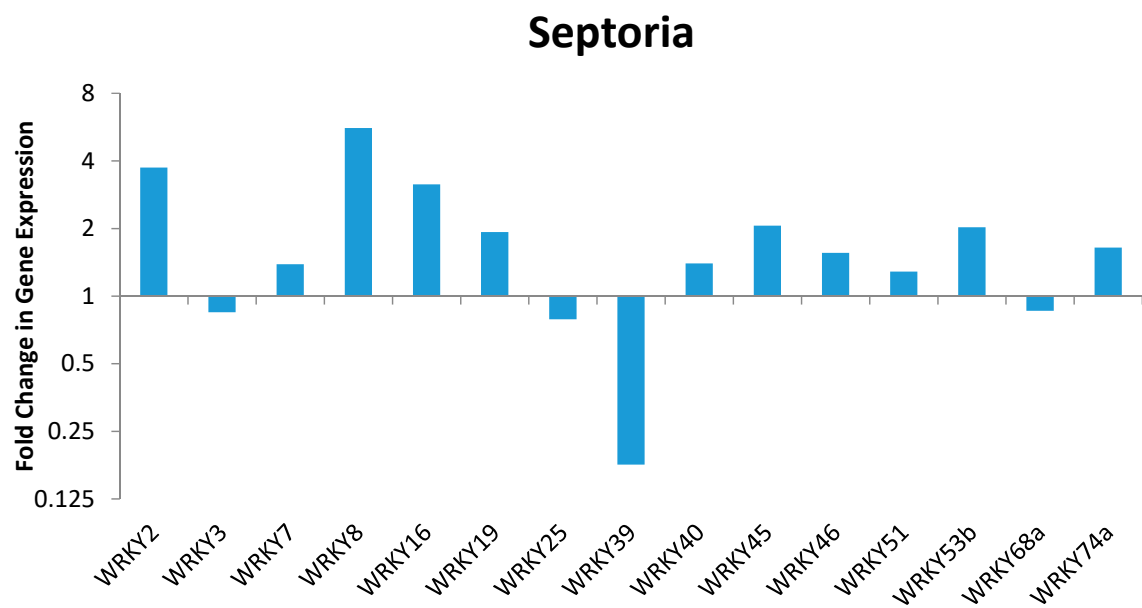

**Supplementary Figure 2.** Changes in expression of WRKYs for which coding sequences were publically available at the time and for which transcripts were detectable in our samples in response to nitrogen reduction and *Septoria* infection. Whilst some WRKYs, such as WRKY8, demonstrated promising results in response to both stressors, sequence similarity to other WRKYs meant it was not possible to obtain a single PCR product, and thus qPCR results were deemed to unreliable to continue including in the analysis.

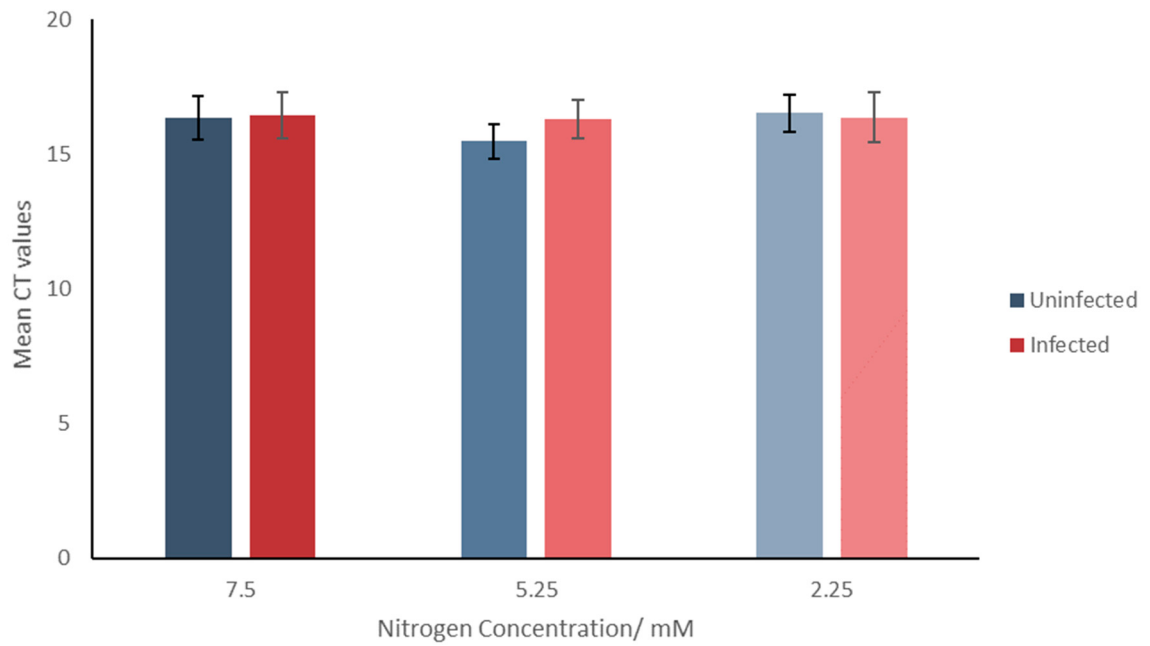

**Supplementary Figure 3** Expression of *EF1α* was consistent across nitrogen concentrations and infection status with no significant treatment effect seen between the six conditions ( $p = 0.478$ ). This confirmed the suitability of *EF1α* as an endogenous control to enable normalisation against total amount of cDNA. Means compared using one-way ANOVA.  $n = 3$  for uninfected conditions,  $n=5$  for infected conditions.
